# Supplementary material for: Prognostic Neurotransmitter Receptors Genes Are Associated with Immune Response, Inflammation and Cancer Hallmarks in Brain Tumors
Source: MDPI journal article supplement (doi:10.3390/cancers14102544), 2022-05-21
Supplement: s1 [file s1]

## Supplementary Information

**Table S1.** Details of the neurotransmitter receptor genes included in the analysis.

| Class         | HGNC ID (gene) | Approved symbol | Tumours in which the gene is DE | Approved name                                           | Chromosome     |
|---------------|----------------|-----------------|---------------------------------|---------------------------------------------------------|----------------|
| Dopamine      | HGNC:3020      | DRD1            | GBM, LGG                        | dopamine receptor D1                                    | 5q35.2         |
|               | HGNC:3023      | DRD2            | None                            | dopamine receptor D2                                    | 11q23.2        |
|               | HGNC:3024      | DRD3            | None                            | dopamine receptor D3                                    | 3q13.31        |
|               | HGNC:3025      | DRD4            | None                            | dopamine receptor D4                                    | 11p15.5        |
|               | HGNC:3026      | DRD5            | None                            | dopamine receptor D5                                    | 4p16.1         |
| Serotonin     | HGNC:5286      | HTR1A           | GBM                             | 5-hydroxytryptamine receptor 1A                         | 5q12.3         |
|               | HGNC:5287      | HTR1B           | None                            | 5-hydroxytryptamine receptor 1B                         | 6q14.1         |
|               | HGNC:5289      | HTR1D           | None                            | 5-hydroxytryptamine receptor 1D                         | 1p36.12        |
|               | HGNC:5291      | HTR1E           | GBM, LGG                        | 5-hydroxytryptamine receptor 1E                         | 6q14.3         |
|               | HGNC:5292      | HTR1F           | None                            | 5-hydroxytryptamine receptor 1F                         | 3p12           |
|               | HGNC:5293      | HTR2A           | GBM, LGG                        | 5-hydroxytryptamine receptor 2A                         | 13q14.2        |
|               | HGNC:5294      | HTR2B           | None                            | 5-hydroxytryptamine receptor 2B                         | 2q37.1         |
|               | HGNC:5295      | HTR2C           | None                            | 5-hydroxytryptamine receptor 2C                         | Xq23           |
|               | HGNC:5299      | HTR4            | None                            | 5-hydroxytryptamine receptor 4                          | 5q32           |
|               | HGNC:5300      | HTR5A           | GBM, LGG                        | 5-hydroxytryptamine receptor 5A                         | 7q36.2         |
|               | HGNC:16291     | HTR5BP          | None                            | 5-hydroxytryptamine receptor 5B, pseudogene             | 2q14.1         |
|               | HGNC:5301      | HTR6            | None                            | 5-hydroxytryptamine receptor 6                          | 1p36.13        |
|               | HGNC:5302      | HTR7            | None                            | 5-hydroxytryptamine receptor 7                          | 10q23.31       |
|               | HGNC:5297      | HTR3A           | None                            | 5-hydroxytryptamine receptor 3A                         | 11q23.2        |
|               | HGNC:5298      | HTR3B           | GBM, LGG                        | 5-hydroxytryptamine receptor 3B                         | 11q23.2        |
|               | HGNC:24003     | HTR3C           | None                            | 5-hydroxytryptamine receptor 3C                         | 3q27.1         |
|               | HGNC:24004     | HTR3D           | None                            | 5-hydroxytryptamine receptor 3D                         | 3q27.1         |
|               | HGNC:24005     | HTR3E           | None                            | 5-hydroxytryptamine receptor 3E                         | 3q27.1         |
| GABA          | HGNC:4075      | GABRA1          | GBM, LGG                        | gamma-aminobutyric acid type A receptor subunit alpha1  | 5q34           |
|               | HGNC:4076      | GABRA2          | GBM, LGG                        | gamma-aminobutyric acid type A receptor subunit alpha2  | 4p12           |
|               | HGNC:4077      | GABRA3          | GBM                             | gamma-aminobutyric acid type A receptor subunit alpha3  | Xq28           |
|               | HGNC:4078      | GABRA4          | GBM, LGG                        | gamma-aminobutyric acid type A receptor subunit alpha4  | 4p12           |
|               | HGNC:4079      | GABRA5          | GBM, LGG                        | gamma-aminobutyric acid type A receptor subunit alpha5  | 15q12          |
|               | HGNC:4080      | GABRA6          | None                            | gamma-aminobutyric acid type A receptor subunit alpha6  | 5q34           |
|               | HGNC:4081      | GABRB1          | None                            | gamma-aminobutyric acid type A receptor subunit beta1   | 4p12           |
|               | HGNC:4082      | GABRB2          | GBM, LGG                        | gamma-aminobutyric acid type A receptor subunit beta2   | 5q34           |
|               | HGNC:4083      | GABRB3          | GBM                             | gamma-aminobutyric acid type A receptor subunit beta3   | 15q12          |
|               | HGNC:4084      | GABRD           | GBM, LGG                        | gamma-aminobutyric acid type A receptor subunit delta   | 1p36.33        |
|               | HGNC:4085      | GABRE           | None                            | gamma-aminobutyric acid type A receptor subunit epsilon | Xq28           |
|               | HGNC:4086      | GABRG1          | GBM                             | gamma-aminobutyric acid type A receptor subunit gamma1  | 4p12           |
|               | HGNC:4087      | GABRG2          | GBM, LGG                        | gamma-aminobutyric acid type A receptor subunit gamma2  | 5q34           |
|               | HGNC:4088      | GABRG3          | GBM                             | gamma-aminobutyric acid type A receptor subunit gamma3  | 15q12          |
|               | HGNC:4089      | GABRP           | None                            | gamma-aminobutyric acid type A receptor subunit pi      | 5q35.1         |
|               | HGNC:14454     | GABRQ           | None                            | gamma-aminobutyric acid type A receptor subunit theta   | Xq28           |
|               | HGNC:4090      | GABRR1          | None                            | gamma-aminobutyric acid type A receptor subunit rho1    | 6q15           |
|               | HGNC:4091      | GABRR2          | None                            | gamma-aminobutyric acid type A receptor subunit rho2    | 6q15           |
|               | HGNC:17969     | GABRR3          | None                            | gamma-aminobutyric acid type A receptor subunit rho3    | 3q11.2         |
| Glutamate     | HGNC:4571      | GRIA1           | None                            | glutamate ionotropic receptor AMPA type subunit 1       | 5q33.2         |
|               | HGNC:4572      | GRIA2           | GBM                             | glutamate ionotropic receptor AMPA type subunit 2       | 4q32.1         |
|               | HGNC:4573      | GRIA3           | GBM                             | glutamate ionotropic receptor AMPA type subunit 3       | Xq25           |
|               | HGNC:4574      | GRIA4           | LGG                             | glutamate ionotropic receptor AMPA type subunit 4       | 11q22.3        |
|               | HGNC:4575      | GRID1           | None                            | glutamate ionotropic receptor delta type subunit 1      | 10q23.1-q23.2  |
|               | HGNC:4576      | GRID2           | LGG                             | glutamate ionotropic receptor delta type subunit 2      | 4q22.1-q22.2   |
|               | HGNC:4579      | GRIK1           | LGG                             | glutamate ionotropic receptor kainate type subunit 1    | 21q21.3        |
|               | HGNC:4580      | GRIK2           | GBM                             | glutamate ionotropic receptor kainate type subunit 2    | 6q16.3         |
|               | HGNC:4581      | GRIK3           | GBM, LGG                        | glutamate ionotropic receptor kainate type subunit 3    | 1p34.3         |
|               | HGNC:4582      | GRIK4           | LGG                             | glutamate ionotropic receptor kainate type subunit 4    | 11q23.3        |
|               | HGNC:4583      | GRIK5           | None                            | glutamate ionotropic receptor kainate type subunit 5    | 19q13.2        |
|               | HGNC:4584      | GRIN1           | GBM, LGG                        | glutamate ionotropic receptor NMDA type subunit 1       | 9q34.3         |
|               | HGNC:4585      | GRIN2A          | GMB, LGG                        | glutamate ionotropic receptor NMDA type subunit 2A      | 16p13.2        |
|               | HGNC:4586      | GRIN2B          | GMB, LGG                        | glutamate ionotropic receptor NMDA type subunit 2B      | 12p13.1        |
|               | HGNC:4587      | GRIN2C          | GBM                             | glutamate ionotropic receptor NMDA type subunit 2C      | 17q25.1        |
|               | HGNC:4588      | GRIN2D          | None                            | glutamate ionotropic receptor NMDA type subunit 2D      | 19q13.33       |
|               | HGNC:16767     | GRIN3A          | GBM                             | glutamate ionotropic receptor NMDA type subunit 3A      | 9q31.1         |
|               | HGNC:16768     | GRIN3B          | None                            | glutamate ionotropic receptor NMDA type subunit 3B      | 19p13.3        |
|               | HGNC:4593      | GRM1            | GBM                             | glutamate metabotropic receptor 1                       | 6q24.3         |
|               | HGNC:4594      | GRM2            | GBM, LGG                        | glutamate metabotropic receptor 2                       | 3p21.2         |
|               | HGNC:4595      | GRM3            | GBM, LGG                        | glutamate metabotropic receptor 3                       | 7q21.11-q21.12 |
|               | HGNC:4596      | GRM4            | GBM, LGG                        | glutamate metabotropic receptor 4                       | 6p21.31        |
|               | HGNC:4597      | GRM5            | GBM                             | glutamate metabotropic receptor 5                       | 11q14.2-q14.3  |
|               | HGNC:4598      | GRM6            | None                            | glutamate metabotropic receptor 6                       | 5q35.3         |
|               | HGNC:4599      | GRM7            | GBM, LGG                        | glutamate metabotropic receptor 7                       | 3p26.1         |
|               | HGNC:4600      | GRM8            | None                            | glutamate metabotropic receptor 8                       | 7q31.33        |
| Acetylcholine | HGNC:1950      | CHRM1           | GBM, LGG                        | cholinergic receptor muscarinic 1                       | 11q12.3        |
|               | HGNC:1951      | CHRM2           | None                            | cholinergic receptor muscarinic 2                       | 7q33           |
|               | HGNC:1952      | CHRM3           | GBM, LGG                        | cholinergic receptor muscarinic 3                       | 1q43           |
|               | HGNC:1953      | CHRM4           | GBM                             | cholinergic receptor muscarinic 4                       | 11p11.2        |
|               | HGNC:1954      | CHRM5           | None                            | cholinergic receptor muscarinic 5                       | 15q14          |
|               | HGNC:1955      | CHRNA1          | None                            | cholinergic receptor nicotinic alpha 1 subunit          | 2q31.1         |
|               | HGNC:1956      | CHRNA2          | GBM, LGG                        | cholinergic receptor nicotinic alpha 2 subunit          | 8p21.2         |
|               | HGNC:1957      | CHRNA3          | None                            | cholinergic receptor nicotinic alpha 3 subunit          | 15q25.1        |
|               | HGNC:1958      | CHRNA4          | GBM                             | cholinergic receptor nicotinic alpha 4 subunit          | 20q13.33       |
|               | HGNC:1959      | CHRNA5          | GBM                             | cholinergic receptor nicotinic alpha 5 subunit          | 15q25.1        |
|               | HGNC:15963     | CHRNA6          | None                            | cholinergic receptor nicotinic alpha 6 subunit          | 8p11.21        |
|               | HGNC:1960      | CHRNA7          | GBM                             | cholinergic receptor nicotinic alpha 7 subunit          | 15q13.3        |
|               | HGNC:14079     | CHRNA9          | GMB                             | cholinergic receptor nicotinic alpha 9 subunit          | 4p14           |
|               | HGNC:13800     | CHRNA10         | None                            | cholinergic receptor nicotinic alpha 10 subunit         | 11p15.4        |
|               | HGNC:1961      | CHRNB1          | GBM, LGG                        | cholinergic receptor nicotinic beta 1 subunit           | 17p13.1        |
|               | HGNC:1962      | CHRNB2          | GBM                             | cholinergic receptor nicotinic beta 2 subunit           | 1q21.3         |
|               | HGNC:1963      | CHRNB3          | None                            | cholinergic receptor nicotinic beta 3 subunit           | 8p11.21        |
|               | HGNC:1964      | CHRNB4          | None                            | cholinergic receptor nicotinic beta 4 subunit           | 15q25.1        |
|               | HGNC:1965      | CHRNA           | None                            | cholinergic receptor nicotinic delta subunit            | 2q37.1         |
|               | HGNC:1966      | CHRNA           | None                            | cholinergic receptor nicotinic epsilon subunit          | 17p13.2        |
|               | HGNC:1967      | CHRNA           | None                            | cholinergic receptor nicotinic gamma subunit            | 2q37.1         |
| Epi/Norepi    | HGNC:277       | ADRA1A          | None                            | adrenoceptor alpha 1A                                   | 8p21.2         |
|               | HGNC:278       | ADRA1B          | GBM, LGG                        | adrenoceptor alpha 1B                                   | 5q33.3         |
|               | HGNC:280       | ADRA1D          | None                            | adrenoceptor alpha 1D                                   | 20p13          |
|               | HGNC:281       | ADRA2A          | GBM                             | adrenoceptor alpha 2A                                   | 10q25.2        |
|               | HGNC:282       | ADRA2B          | None                            | adrenoceptor alpha 2B                                   | 2q11.2         |
|               | HGNC:283       | ADRA2C          | GBM, LGG                        | adrenoceptor alpha 2C                                   | 4p16.3         |
|               | HGNC:285       | ADRB1           | GBM, LGG                        | adrenoceptor beta 1                                     | 10q25.3        |
|               | HGNC:286       | ADRB2           | None                            | adrenoceptor beta 2                                     | 5q32           |
|               | HGNC:288       | ADRB3           | None                            | adrenoceptor beta 3                                     | 8p11.23        |

**Table S2.** Outcomes of the univariate analysis using the Cox proportional-hazard model. The prognostic value of each of the genes in Fig. 3a was tested using a univariate analysis. The assumption of the proportional hazard model was tested using the scaled Schoenfeld residuals test and the P-values are shown in the tables.

| TCGA cancer | Gene symbol | HR (95% CI)      | p value | TCGA cancer | Gene symbol | HR (95% CI)      | p value    |
|-------------|-------------|------------------|---------|-------------|-------------|------------------|------------|
| <b>GBM</b>  | DRD1        | 1.6 (1.1-2.3)    | 0.64    | <b>LGG</b>  | DRD1        | 0.49 (0.3-0.79)  | 0.68       |
|             | HTR1E       | 1.5 (1-2.2)      | 0.22    |             | HTR1E       | 0.62 (0.4-0.96)  | 0.58       |
|             | HTR5A       | 0.51 (0.32-0.81) | 0.45    |             | HTR2A       | 0.41 (0.29-0.58) | 0.069      |
|             | HTR3B       | 1.6 (1.1-2.3)    | 0.49    |             | HTR5A       | 0.44 (0.28-0.7)  | 0.24       |
|             | GABRA1      | 1.5 (1-2.2)      | 0.49    |             | HTR3B       | 0.51 (0.27-0.95) | 0.43       |
|             | GABRA2      | 1.6 (1.1-2.3)    | 0.72    |             | GABRA1      | 0.4 (0.27-0.59)  | 0.43       |
|             | GABRA3      | 0.57 (0.33-0.99) | 0.32    |             | GABRA2      | 1.7 (1-2.8)      | 0.77       |
|             | GABRA5      | 1.8 (1.2-2.6)    | 0.17    |             | GABRA4      | 0.61 (0.43-0.87) | 0.78       |
|             | GABRB2      | 1.5 (1.1-2.2)    | 0.47    |             | GABRA5      | 0.6 (0.39-0.91)  | 0.28       |
|             | GABRD       | 1.9 (1.3-2.9)    | 0.094   |             | GABRB2      | 0.5 (0.32-0.77)  | 0.84       |
|             | GABRG2      | 1.5 (1-2.3)      | 0.82    |             | GABRD       | 0.28 (0.19-0.4)  | 0.038*     |
|             | GABRG3      | 1.5 (1-2.3)      | 0.075   |             | GABRG2      | 0.3 (0.2-0.47)   | 0.41       |
|             | GRIA3       | 0.64 (0.39-1)    | 0.5     |             | GRIA4       | 0.35 (0.25-0.49) | 0.00072*** |
|             | GRIN1       | 1.4 (0.98-2.1)   | 0.11    |             | GRID2       | 0.41 (0.29-0.58) | 0.81       |
|             | GRIN3A      | 1.4 (0.85-2.2)   | 0.46    |             | GRIK1       | 4.1 (2.8-6.1)    | 0.0071**   |
|             | GRM5        | 1.6 (1.1-2.3)    | 0.73    |             | GRIK4       | 0.28 (0.2-0.4)   | 0.27       |
|             | GRM7        | 1.5 (1.1-2.2)    | 0.26    |             | GRIN1       | 0.28 (0.18-0.44) | 0.24       |
|             | CHRM3       | 1.9 (1.1-3.2)    | 0.85    |             | GRIN2A      | 0.44 (0.27-0.73) | 0.11       |
|             | CHRM4       | 2 (1.3-3.2)      | 0.2     |             | GRIN2B      | 0.46 (0.31-0.68) | 0.28       |
|             | CHRNA5      | 1.8 (1.1-3.2)    | 0.79    |             | GRM2        | 0.59 (0.42-0.84) | 0.8        |
|             | CHRNA7      | 0.69 (0.46-1)    | 0.93    |             | GRM3        | 0.51 (0.25-1)    | 0.51       |
|             | CHRN2       | 1.8 (1.2-2.7)    | 0.95    |             | GRM4        | 0.41 (0.28-0.61) | 0.085      |
|             | ADRA1B      | 1.7 (1.1-2.5)    | 0.37    |             | GRM7        | 0.64 (0.45-0.93) | 0.35       |
|             | ADRA2A      | 1.7 (1.1-2.7)    | 0.77    |             | CHRM1       | 0.49 (0.32-0.73) | 0.52       |
|             | ADRA2C      | 1.9 (1.2-3.1)    | 0.2     |             | CHRM2       | 1.9 (1.3-2.9)    | 0.12       |
|             |             |                  |         |             | CHRNA2      | 0.46 (0.29-0.72) | 0.91       |
|             |             |                  |         |             | CHRN2       | 3 (1.9-4.8)      | 0.081      |
|             |             |                  |         |             | ADRA1B      | 0.46 (0.32-0.66) | 0.73       |
|             |             |                  |         |             | ADRA2C      | 0.46 (0.3-0.7)   | 0.0046*    |

**Table S3.** KEGG enrichment analysis.

| Pathway                                          | Total | Expected | Hits | P.Value  | FDR      | Genes involved                       |
|--------------------------------------------------|-------|----------|------|----------|----------|--------------------------------------|
| GABAergic synapse                                | 89    | 0.104    | 5    | 2.19E-08 | 6.95E-06 | GABRA4, PRKCG, GABRA1, GABRB2, TRAK2 |
| Morphine addiction                               | 91    | 0.106    | 4    | 2.16E-06 | 0.000343 | GABRA4, PRKCG, GABRA1, GABRB2        |
| Nicotine addiction                               | 40    | 0.0465   | 3    | 1.05E-05 | 0.00112  | GABRA4, GABRA1, GABRB2               |
| Retrograde endocannabinoid signaling             | 148   | 0.172    | 4    | 1.50E-05 | 0.0012   | GABRA4, PRKCG, GABRA1, GABRB2        |
| Serotonergic synapse                             | 115   | 0.134    | 3    | 0.000252 | 0.016    | APP, PRKCG, GABRB2                   |
| Taste transduction                               | 83    | 0.0965   | 2    | 0.0039   | 0.201    | GABRA4, GABRA1                       |
| Fc gamma R-mediated phagocytosis                 | 91    | 0.106    | 2    | 0.00467  | 0.201    | PRKCG, PRKCD                         |
| Inflammatory mediator regulation of TRP channels | 100   | 0.116    | 2    | 0.00561  | 0.201    | PRKCG, PRKCD                         |
| Neuroactive ligand-receptor interaction          | 338   | 0.393    | 3    | 0.0057   | 0.201    | GABRA4, GABRA1, GABRB2               |
| Vascular smooth muscle contraction               | 132   | 0.154    | 2    | 0.00961  | 0.306    | PRKCG, PRKCD                         |

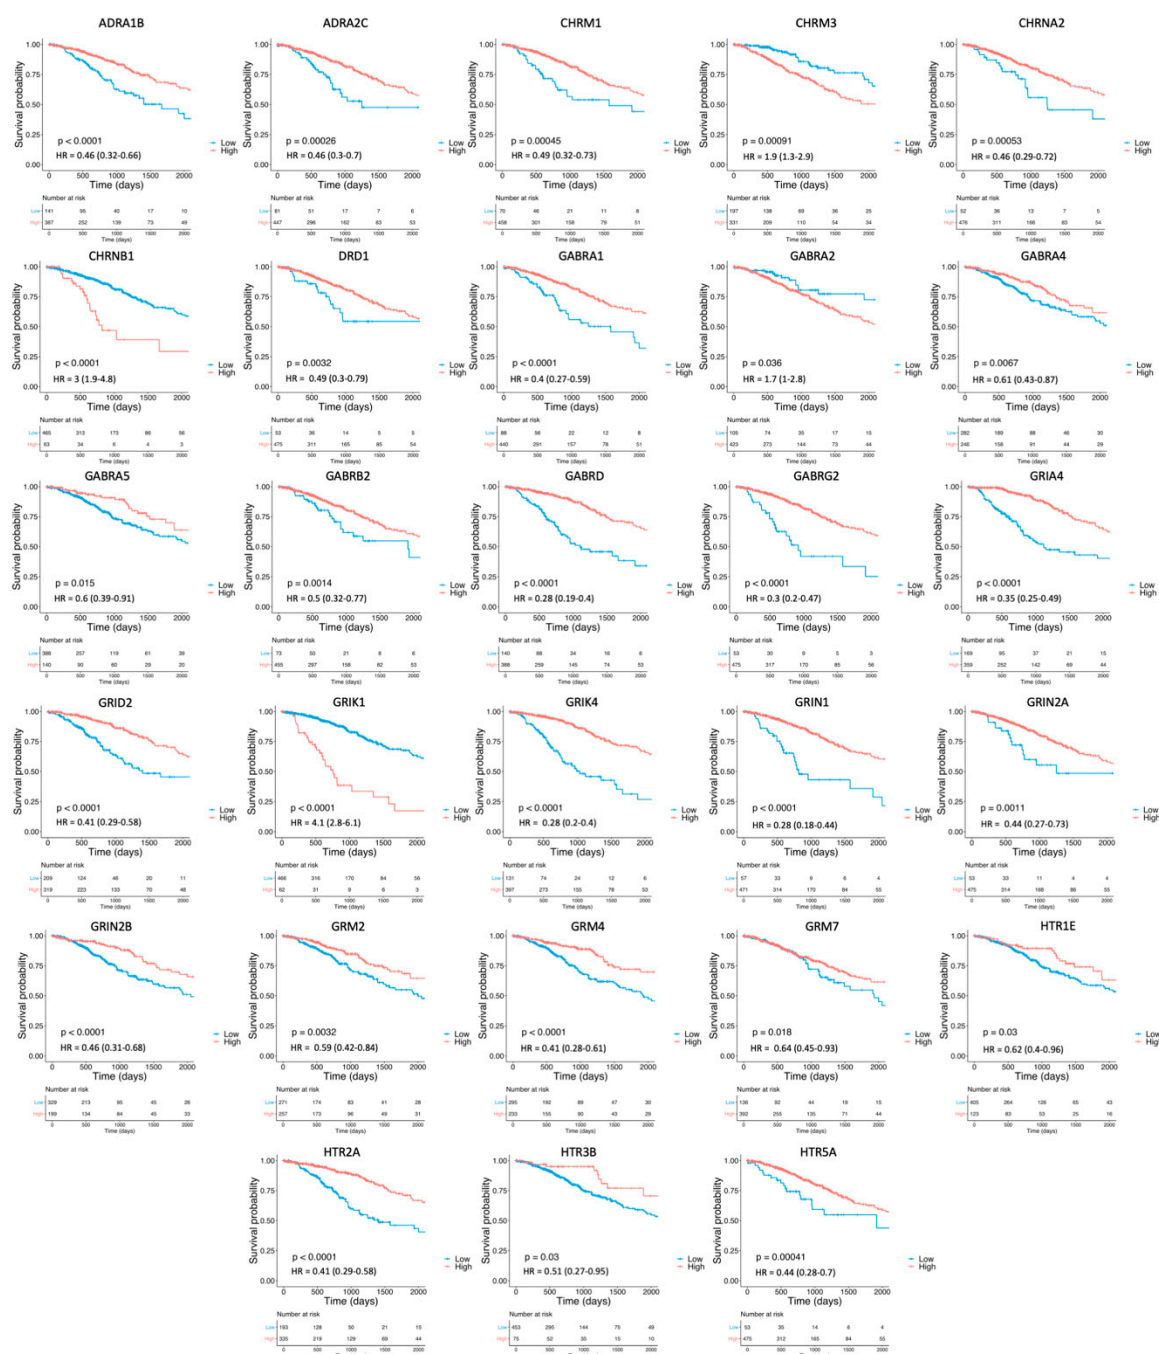

**Figure S1.** Overall survival probabilities as a function of the levels of the differentially expressed genes in LGG. Only the statistically significant ( $P \leq 0.05$ , log-rank test) cases are shown. The effect on overall survival probabilities of each NT receptor gene was assessed using a Cox Proportional-Hazard Model and the hazard ratio (HR) is shown.

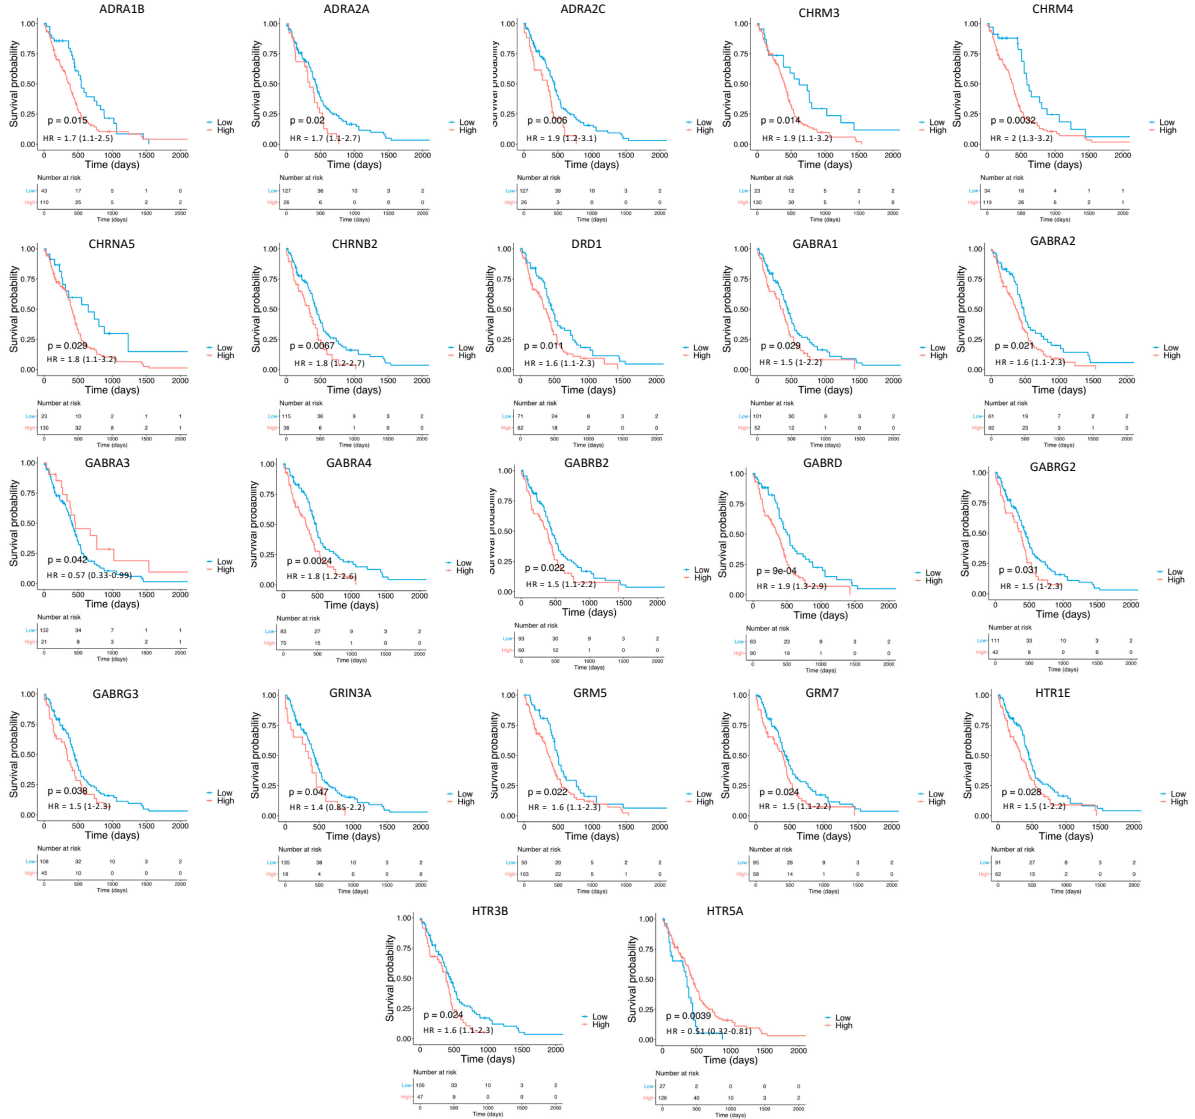

**Figure S2.** Overall survival probabilities as a function of the levels of the differentially expressed genes in GBM. Only the statistically significant ( $P \leq 0.05$ , log-rank test) cases are shown. The effect on overall survival probabilities of each NT receptor gene was assessed using a Cox Proportional-Hazard Model and the hazard ratio (HR) is shown.

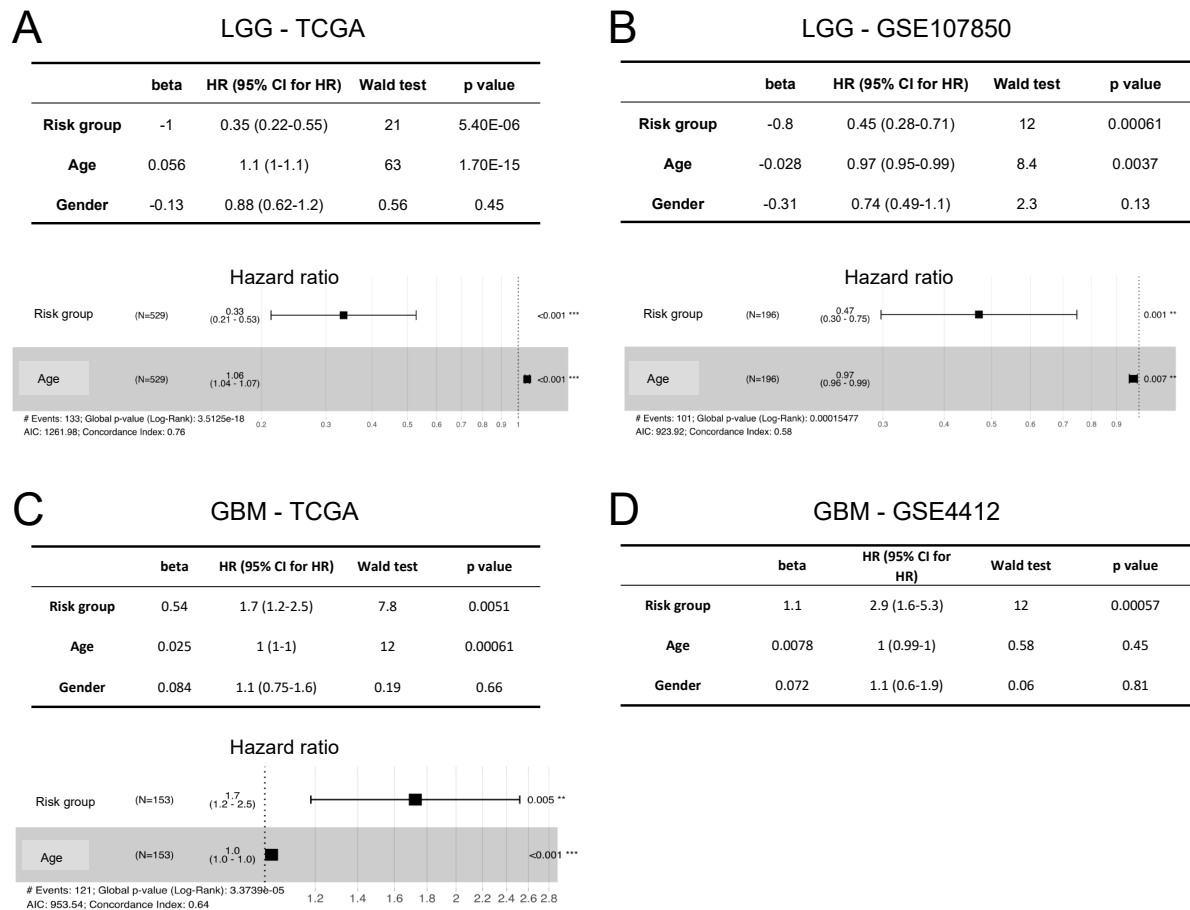

**Figure S3.** External validation of the prognostic value of the gene signatures identified in the TCGA brain cancers. (A) Outcomes of the univariate and multivariate analysis of the neurotransmitters-associated prognostic index for low grade glioma using the data from TCGA. (B) Validation of the prognostic index in (A) on an external dataset (accession code GSE107850). (C) Outcomes of the univariate and multivariate analysis of the neurotransmitters-associated prognostic index for glioblastoma multiforme (GBM) the data from TCGA. (D) Validation of the prognostic index in (C) on an external dataset (accession code GSE4412-GPL96). The prognostic factor “risk group” was compared with other clinical confounders using univariate analysis using the Cox proportional-hazard model, as shown in tables. The forest plots show the outcome of the multivariate analysis of the factors that were statistically significant at the univariate analysis.

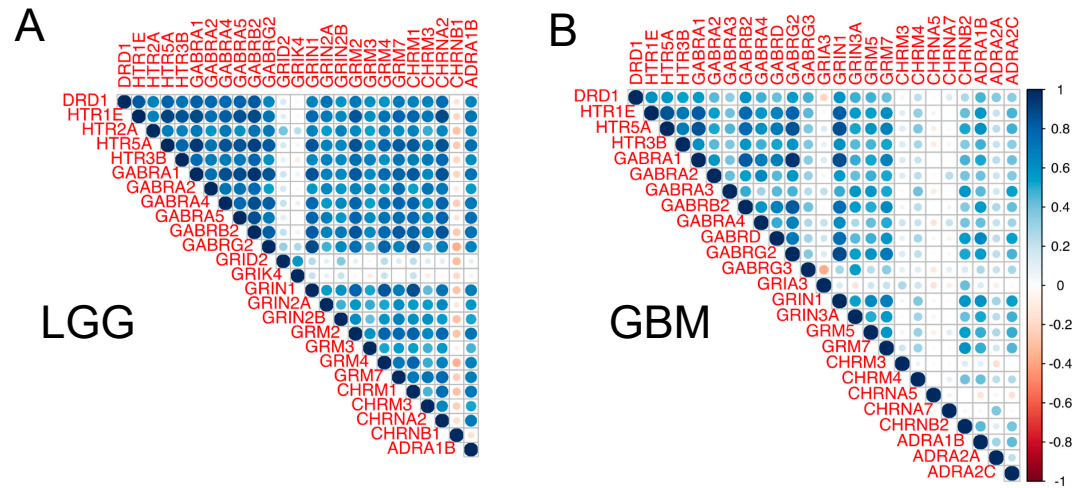

**Figure S4.** Correlation among differentially expressed prognostic NTR genes in brain cancers. (A) Low-grade glioma (LGG). (B) Glioblastoma multiforme (GBM). Colour intensity and the size of the dots are proportional to the Pearson correlation coefficients.

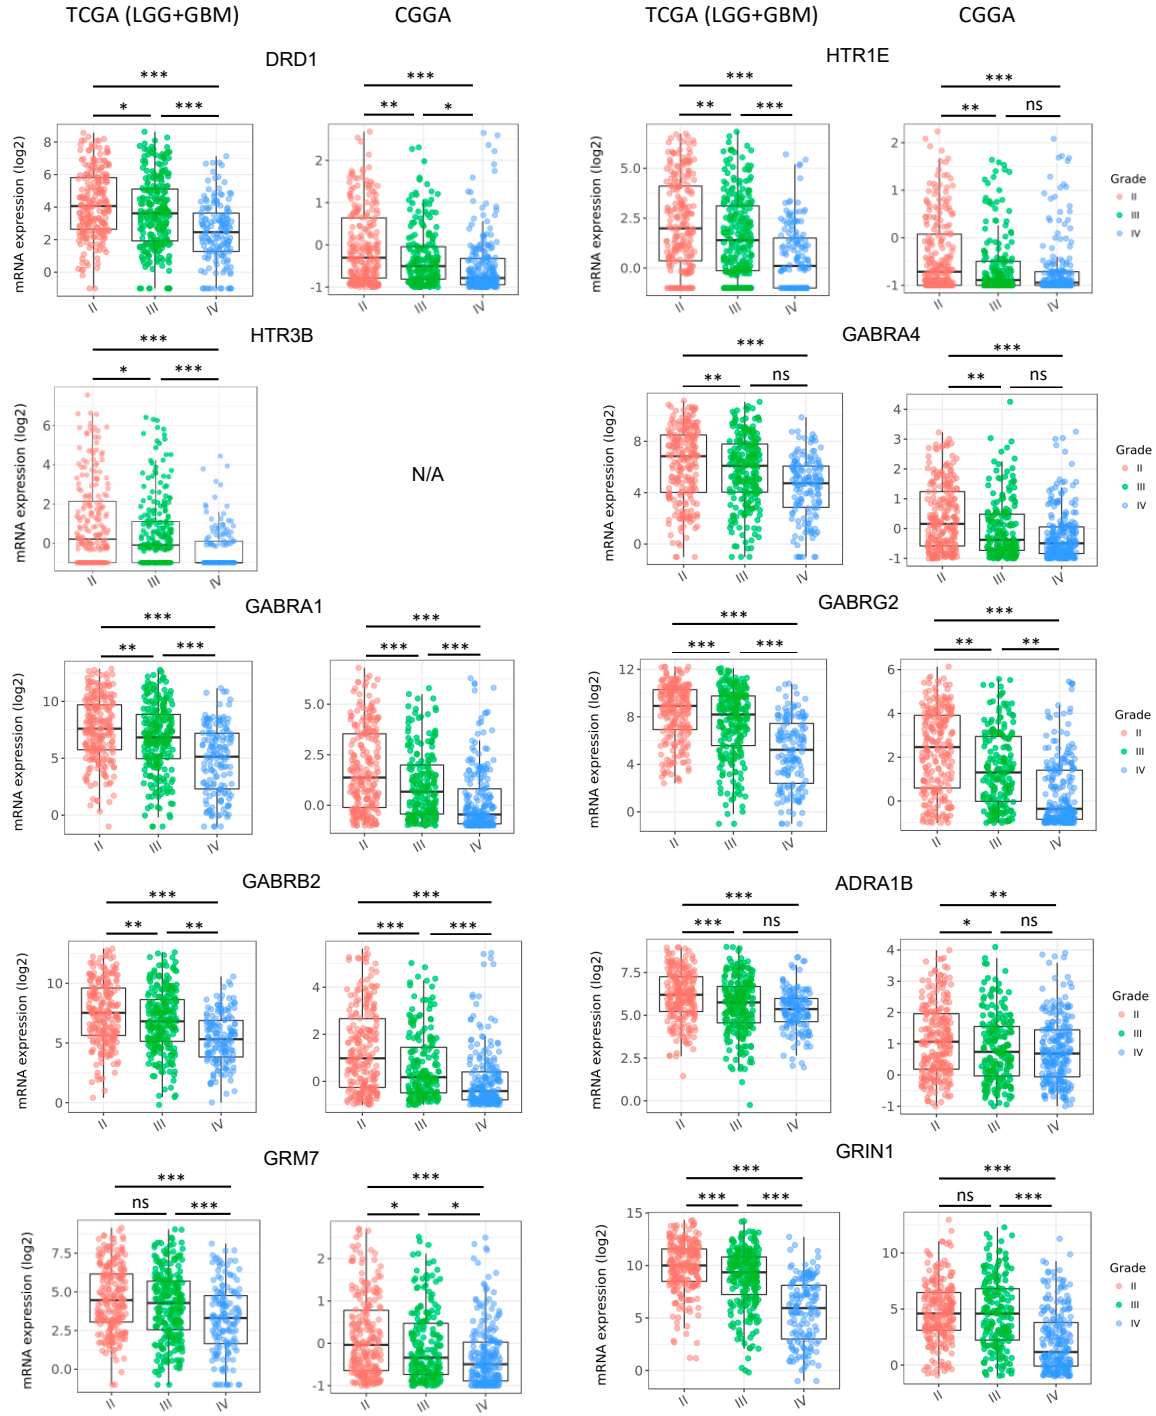

**Figure S5.** Gene expression levels of the 10-NTR genes as a function of the cancer grade. Both TCGA (The Cancer Genome Atlas) and CGGA (Chinese Glioma Genome Atlas) datasets were accessed. The data were classified based on the WHO grade. The centre line indicates the median. The boxes show the distance between the first and third quartile with the whiskers extending up to 1.5 times the interquartile range, the line is the median. The Tukey's Honest Significant Difference (HSD) was used to test estimate the difference in expression levels among the different grades. \*\*\*  $p \leq 0.001$ ; \*\*  $p \leq 0.01$ ; \*  $p \leq 0.05$ ; ns, not significant. The gene HTR3B was not available in the CGGA dataset.



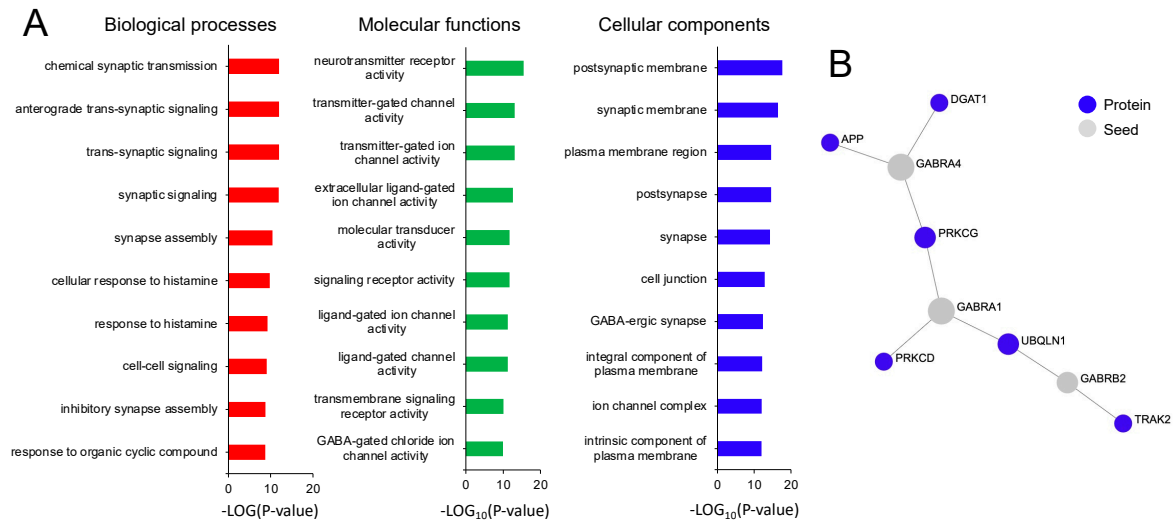

**Figure S6.** Gene ontology enrichment and network analysis of the 10-NTR genes. (A) Top 10 enrichment scores in the Gene Ontology (GO) enrichment analysis of the NTR 10 genes with opposite association with clinical outcomes between LGG and GBM: DRD1, HTR1E, HTR3B, GABRA1, GABRA4, GABRB2, GABRG2, GRIN1, GRM7, and ADRA1B. (B) Brain-specific protein-protein interactions (PPI) network analysis. The subnetwork contains 9 nodes, 8 edges and 3 seeds.

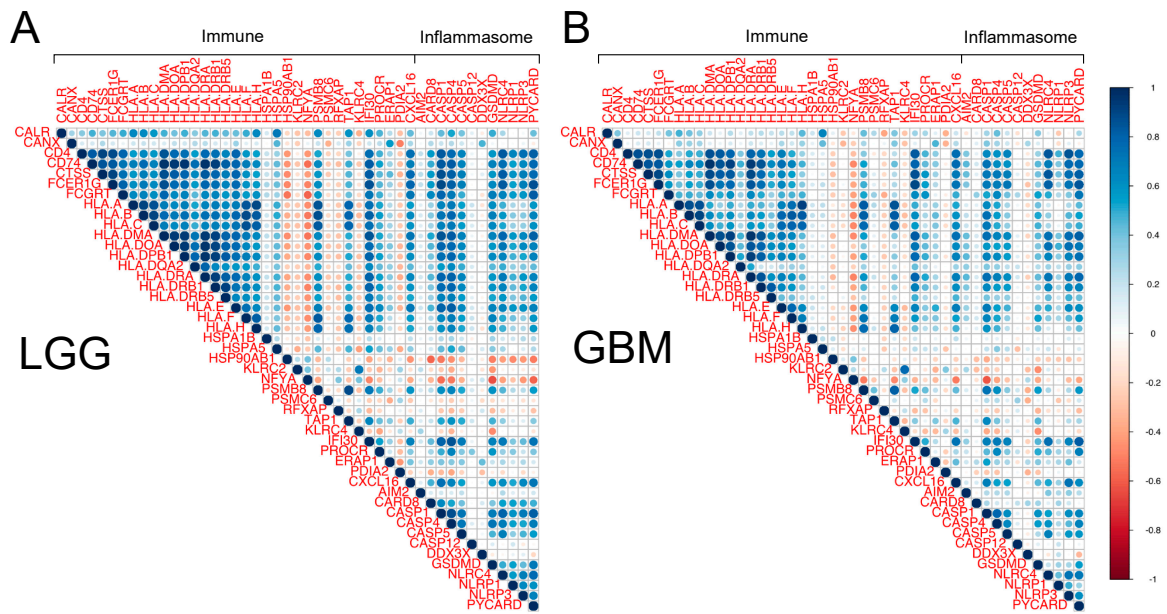

**Figure S7.** Correlation between immune and inflammasome gene panels in brain cancers. (A) Low-grade glioma (LGG). (B) Glioblastoma multiforme (GBM). Colour intensity and the size of the dots are proportional to the Pearson correlation coefficients.



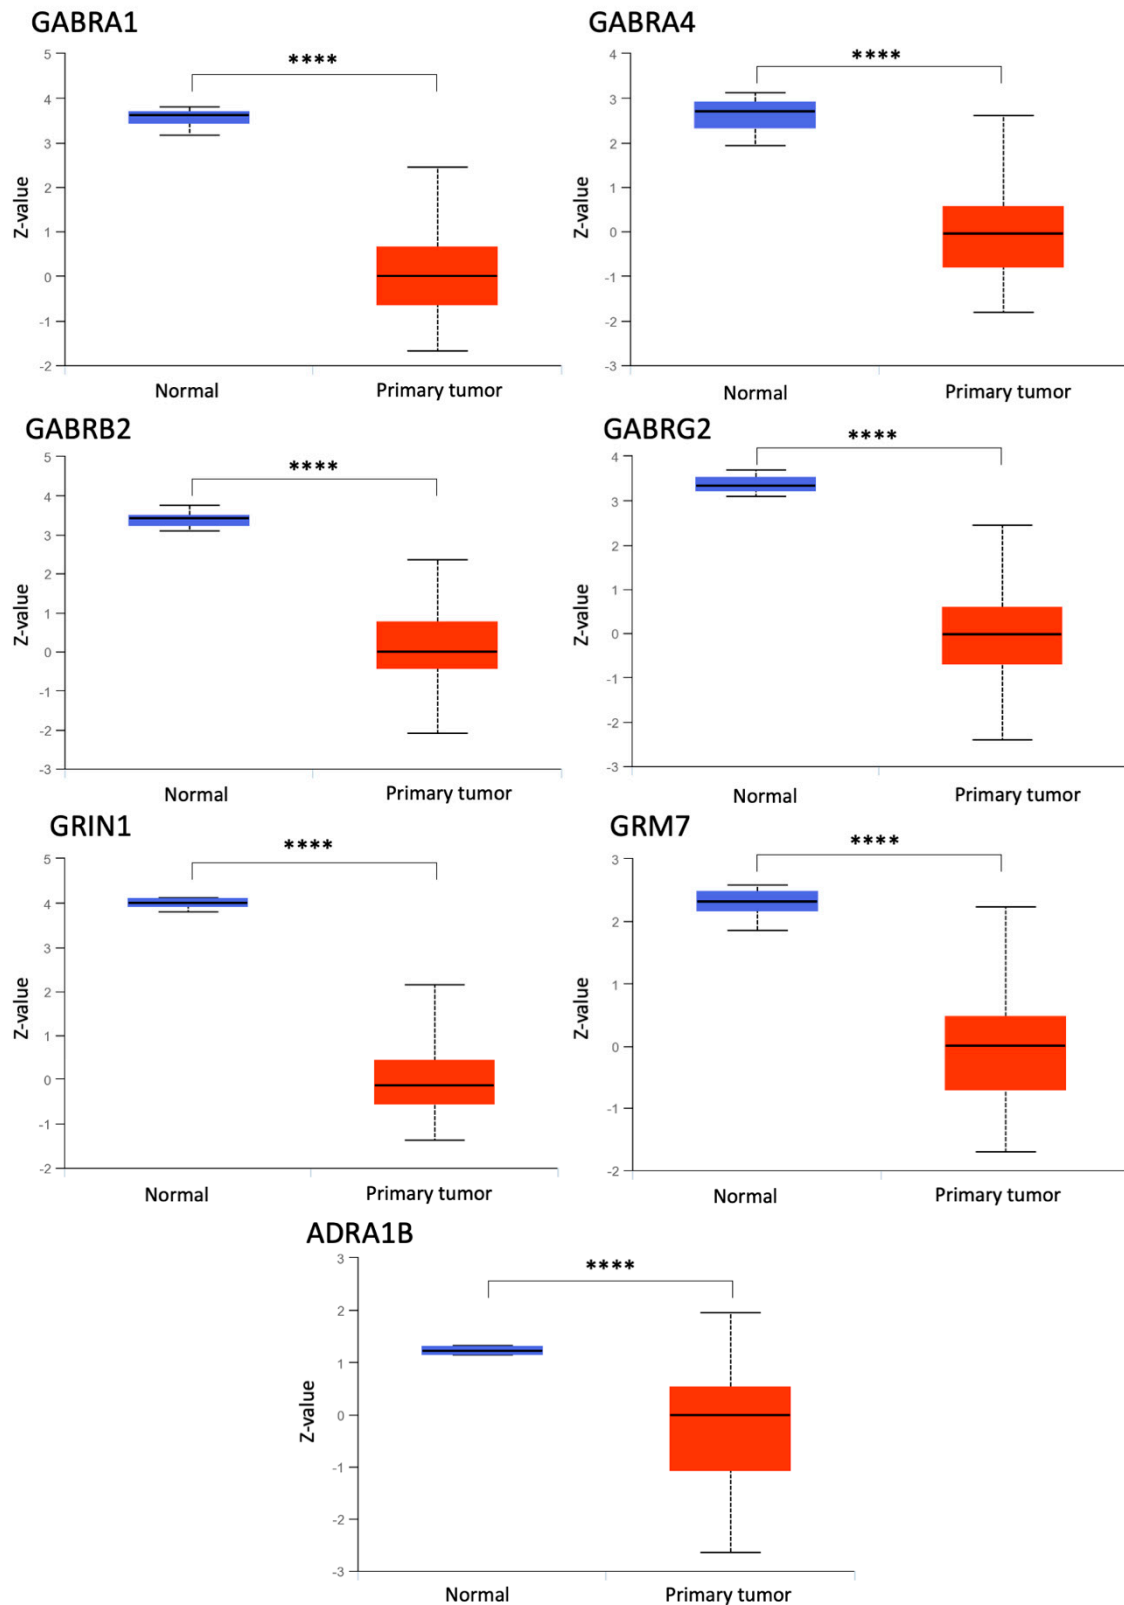

**Figure S8.** Protein expression levels of the NTR genes in GBM and normal tissue. Seven out of the ten proteins encoded by the NTR genes were found. Z-values show the standard deviations from the median across samples for each type of tissue. The spectral count ratio values from the Clinical Proteomic Tumor Analysis Consortium (CPTAC) were first log2 transformed, normalized within each sample profile, and then normalized across samples. The University of ALabama at Birmingham CANcer data analysis Portal (UALCAN) was used to visualize the box plots and compute the two-sided t-test between the two groups. \*\*\*\*  $p \leq 0.0001$ .
